## Correction for: Hypothalamic S1P/S1PR1 axis controls energy homeostasis in Middle-Aged Rodents: the reversal effects of physical exercise

Vagner Ramon Rodrigues Silva<sup>1,2</sup>, Carlos Kiyoshi Katashima<sup>2</sup>, Carla G. Bueno Silva<sup>2</sup>, Luciene Lenhare<sup>2</sup>, Thayana Oliveira Micheletti<sup>2</sup>, Rafael Ludemann Camargo<sup>2</sup>, Ana Carolina Ghezzi<sup>2</sup>, Juliana Alves Camargo<sup>2</sup>, Alexandre Moura Assis<sup>2</sup>, Natalia Tobar<sup>2</sup>, Joseane Morari<sup>2</sup>, Daniela S. Razolli<sup>2</sup>, Leandro Pereira Moura<sup>1</sup>, José Rodrigo Pauli<sup>1,2,3</sup>, Dennys Esper Cintra<sup>1</sup>, Lício Augusto Velloso<sup>2,4</sup>, Mario J.A. Saad<sup>2</sup>, Eduardo Rochete Ropelle<sup>1,2,3,4</sup>

<sup>1</sup>School of Applied Sciences, University of Campinas, Limeira, SP, Brazil

<sup>2</sup>Department of Internal Medicine, University of Campinas, Campinas, SP, Brazil

<sup>3</sup>CEPECE - Research Center of Sport Sciences, School of Applied Sciences, University of Campinas, Limeira, SP, Brazil

<sup>4</sup>Laboratory of Cell Signaling, Obesity and Comorbidities Research Center, University of Campinas, Campinas, 1308-970, Brazil

**Correspondence to:** Eduardo Rochete Ropelle **email:** [eduardoropelle@gmail.com](mailto:eduardoropelle@gmail.com)

**Original article:** *Aging (Albany NY)* 2020; 9: 142–155

PMID: 28039439

PMCID: PMC5310661

doi: [10.18632/aging.101138](https://doi.org/10.18632/aging.101138)

**This article has been corrected:** The authors requested replacement of Figure 4h (upper panel). Originally, to represent the morphology of brown adipose tissue (BAT) in the Middle-Aged group, the authors used the same image in Figure 3c (lower panel) and Figure 4h (upper panel). To avoid misinterpretation, they have replaced the Middle-Aged, Rest panel (Figure 4h) with a representative image from the original set of experiments. This alteration does not affect the results or conclusions drawn in this work.

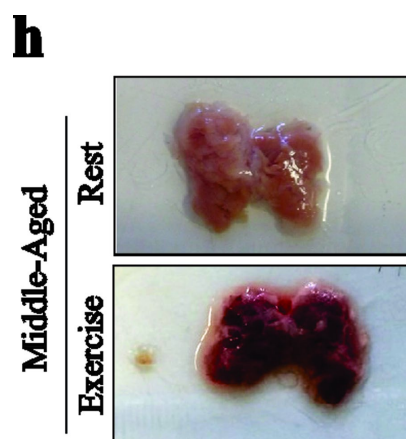

**Figure 4. Acute exercise improves S1PR1/STAT3 in the hypothalamus of rats.** Western blot showing UCP1 expression in BAT (g) and Image of BAT (n=6 per group) (h).
